# Supplementary material for: Rapid analysis of N-nitrosamines in urine using ultra high-pressure liquid chromatography-mass spectrometry
Source: Royal Society of Chemistry journal article supplement (doi:10.1039/d4ay01870b), 2024-01-01
Supplement: d4ay01870b1.pdf [file d4ay01870b1.pdf]

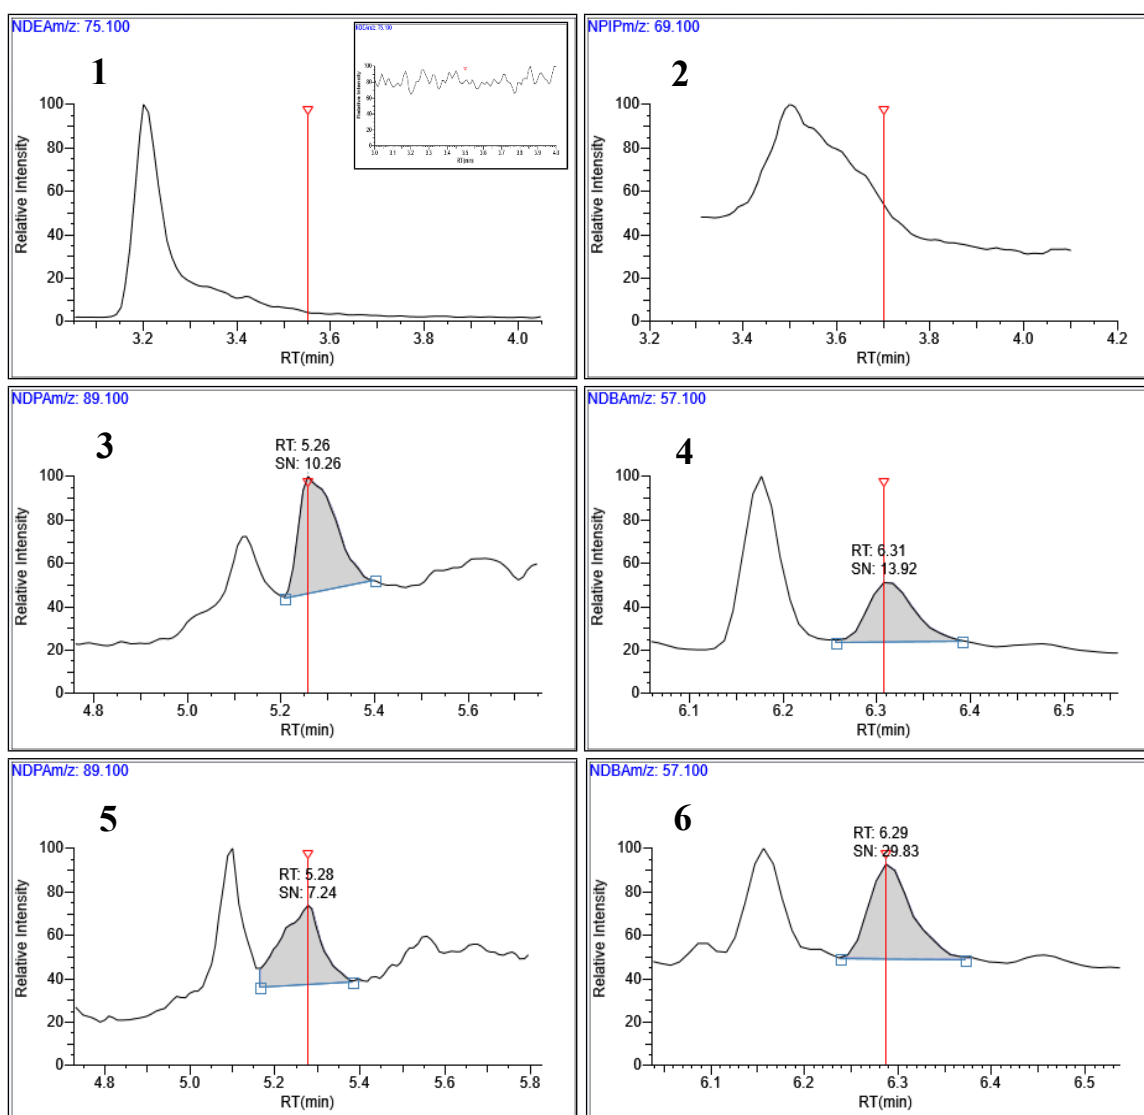

**Figure S1.** Representative SRM chromatograms by liquid chromatography-tandem mass spectrometry (LCMS/MS) monitored in positive ion mode in Panels 1, 2, 3 and 4-Blank sample with Milli-Q water, without deuterated IS and EPA 521 mixture, extracted under similar experimental conditions, 1-NDEA ( $m/z$  103.1· $m/z$  75.1), 2-NPIP ( $m/z$  115.1 ·  $m/z$  69.1), 3-NDPA ( $m/z$  131.1· $m/z$  89.1), 4-NDBA ( $m/z$  159.1 ·  $m/z$  57.1). Inset of panel 1 and Panels 5 and 6- Solvent blanks for NDEA, NDPA and NDBA with similar parent to product ion transitions as in 1, 3 and 4 respectively.

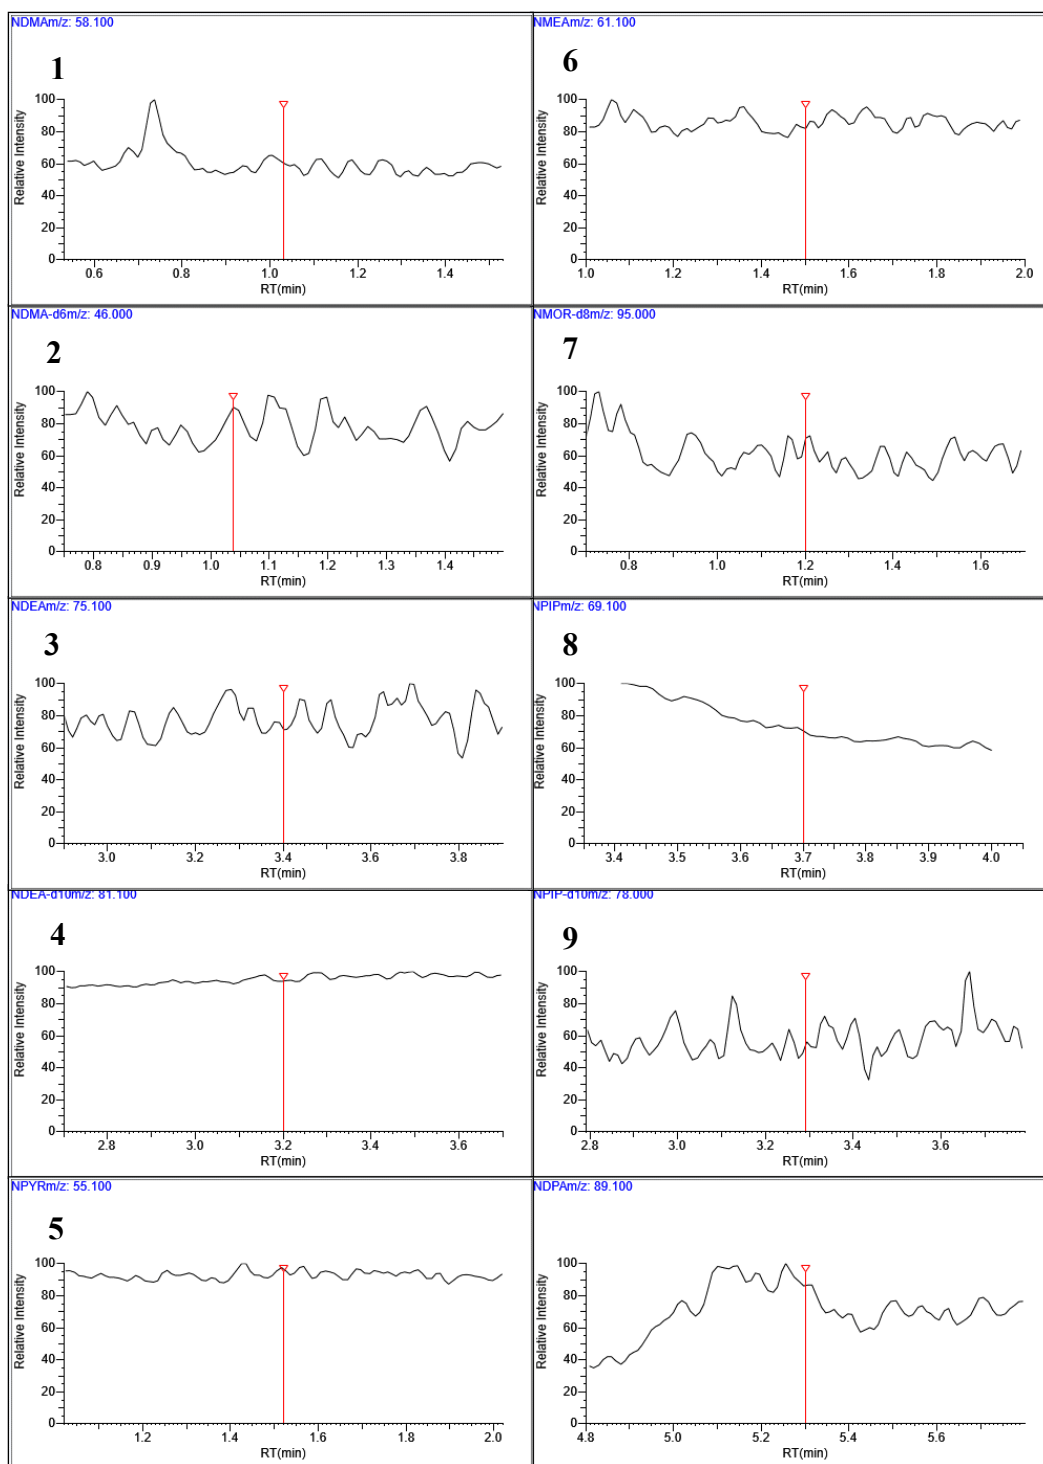

**Figure S2.** Representative SRM chromatograms by liquid chromatography-tandem mass spectrometry (LCMS/MS) monitored in positive ion mode in methanol solvent wash run *panels* 1-NDMA ( $m/z$  75.1 ·  $m/z$  58.1), 2-NDMA- $d_6$  ( $m/z$  81.088 ·  $m/z$  46.0), 3-NDEA ( $m/z$  103.1 ·  $m/z$  75.1), 4-NDEA- $d_{10}$  ( $m/z$  113.175 ·  $m/z$  81.1), 5-NPYR ( $m/z$  101.1 ·  $m/z$  55.1), 6-NMEA ( $m/z$  89.1 ·  $m/z$  61.1), 7-NMOR- $d_8$  ( $m/z$  125.1 ·  $m/z$  95.0), 8-NPIP ( $m/z$  115.1 ·  $m/z$  69.1), 9-NPIP- $d_{10}$  ( $m/z$  125.2 ·  $m/z$  78.0), 10-NDPA ( $m/z$  131.1 ·  $m/z$  89.1).

**Table S1.** Precision for injection repeatability and %CV for (A) standard solution of *N*-Nitrosamines, EPA 521 mixture (4 ng) and (B) urine spiked with EPA 521 mix (4 ng) following extraction.

| Compound | A           |      | B           |      |
|----------|-------------|------|-------------|------|
|          | Amount (ng) | % CV | Amount (ng) | % CV |
| NDMA     | 3.85 ±0.17  | 4.49 | 1.72 ±0.10  | 6.74 |
| NDEA     | 4.34 ±0.22  | 5.07 | 1.98 ±0.08  | 4.10 |
| NMEA     | 4.53 ±0.13  | 2.79 | 1.84 ±0.13  | 7.07 |
| NPYR     | 4.82 ±0.13  | 2.79 | 1.69 ±0.10  | 6.06 |
| NPIP     | 4.11 ±0.09  | 2.27 | 1.93 ±0.17  | 8.80 |
| NDPA     | 4.06 ± 0.23 | 5.57 | 1.94 ±0.13  | 6.80 |
| NDBA     | 4.44 ± 0.17 | 3.93 | 1.92 ±0.13  | 6.95 |
